# Supplementary material for: Solvent-induced local environment effect in plasmonic catalysis
Source: Royal Society of Chemistry journal article supplement (doi:10.1039/d3na00835e), 2023-01-01
Supplement: d3na00835e1.pdf [file d3na00835e1.pdf]

## Supplementary Information for

### Solvent-Induced Local Environment Effect in Plasmonic Catalysis

Tien Le, Bin Wang

*School of Sustainable Chemical, Biological and Materials Engineering, University of Oklahoma,*

*Norman, OK 73019, United States*

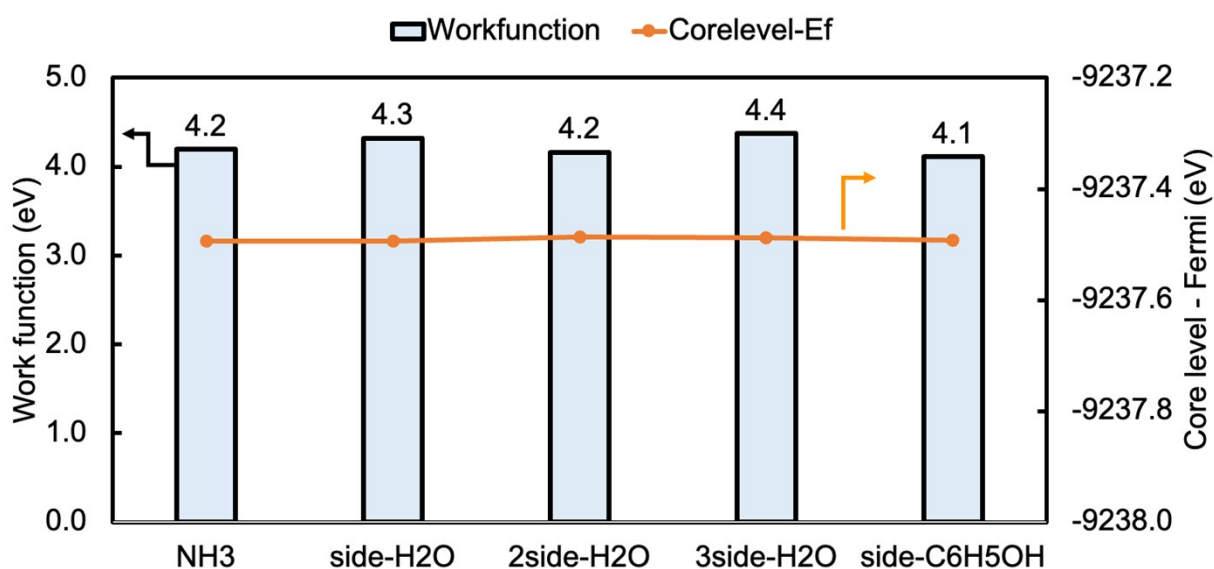

**Figure S1:** The changing of work function and the energy difference between core level of Cu 1s with respect to the Fermi level as the number of H<sub>2</sub>O/C<sub>6</sub>H<sub>5</sub>OH molecules increases.

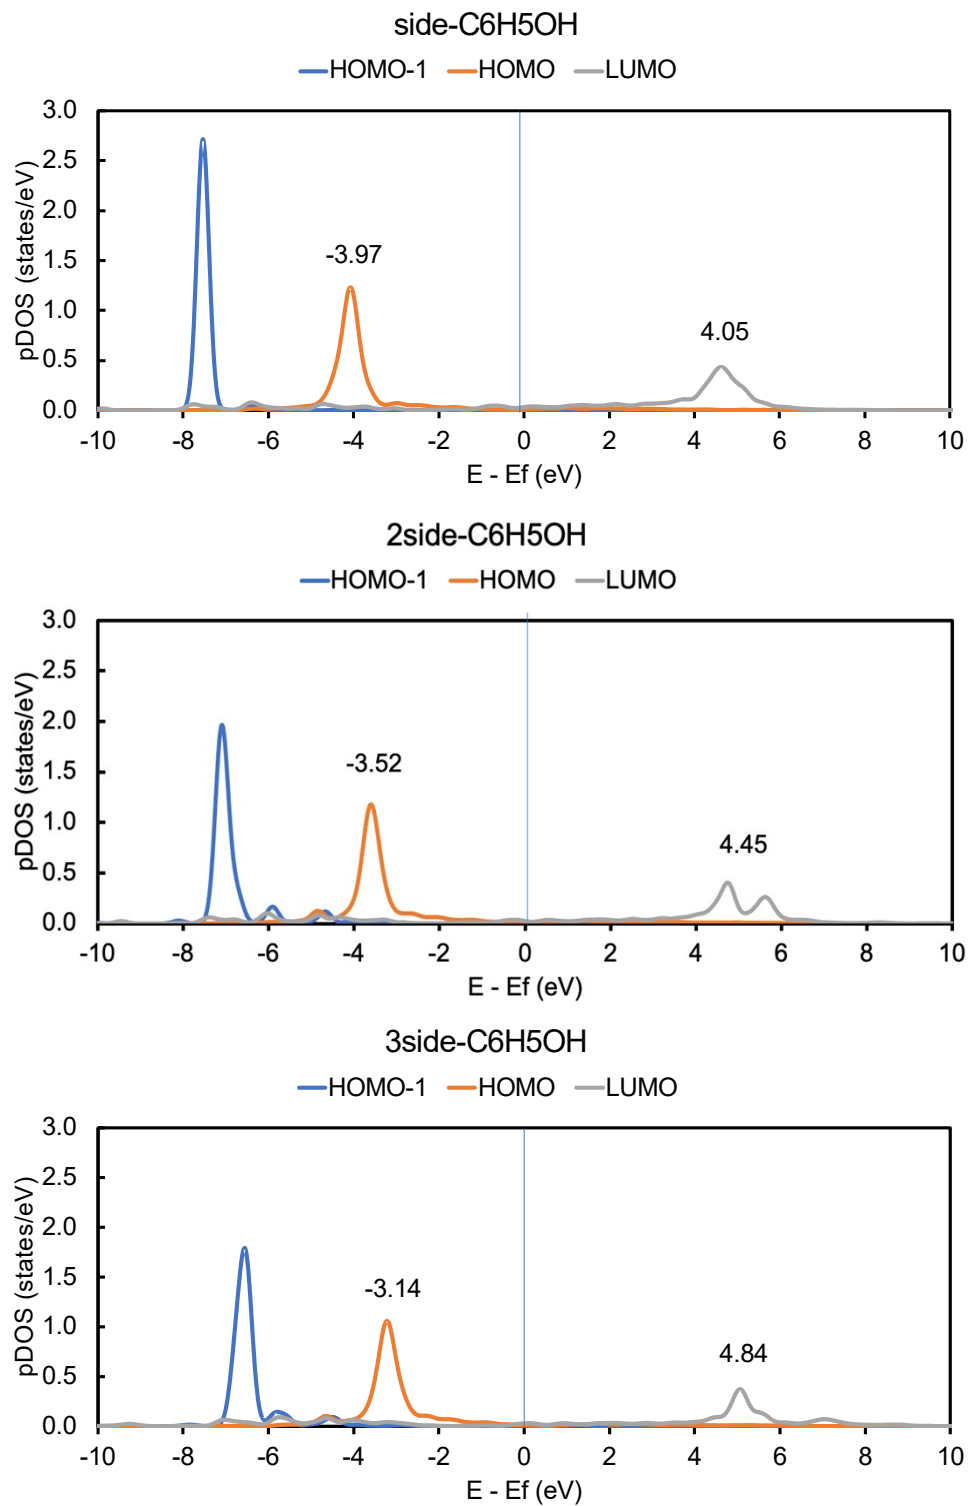

Figure S2: Density of states projected onto frontier orbitals of adsorbed  $\text{NH}_3$  surrounded by  $\text{C}_6\text{H}_5\text{OH}$ . The center of the HOMO and LUMO of  $\text{NH}_3$  are shown above the main peak.

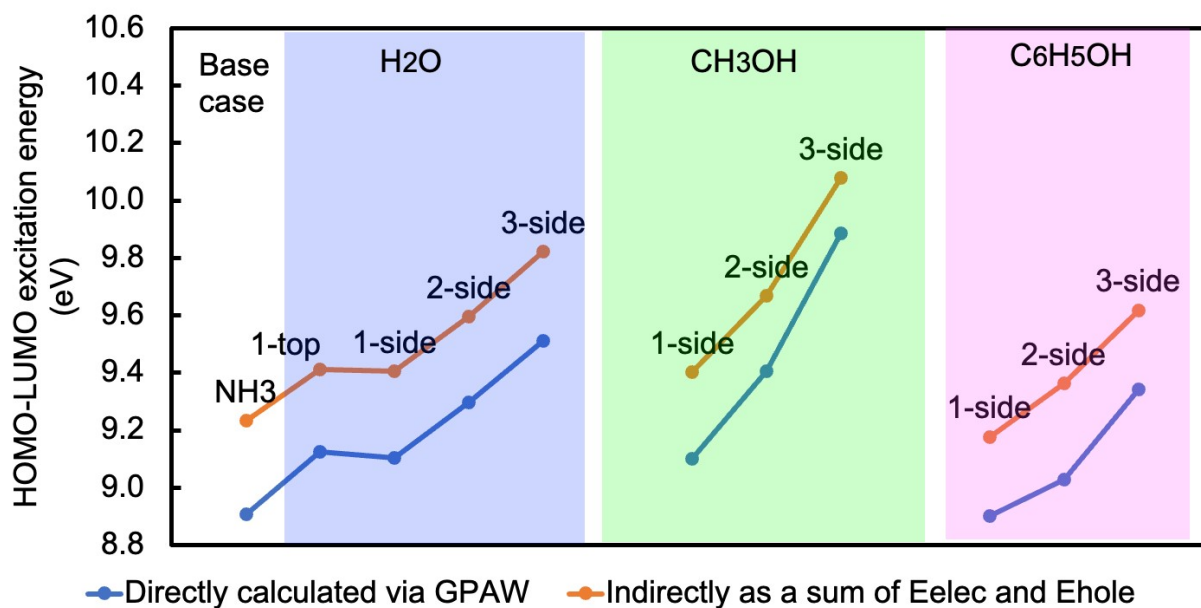

Figure S3: Comparison of the HOMO-LUMO gap when it is directly calculated via GPAW versus when it is indirectly calculated as a sum of  $E_{elec}$  and  $E_{hole}$ .

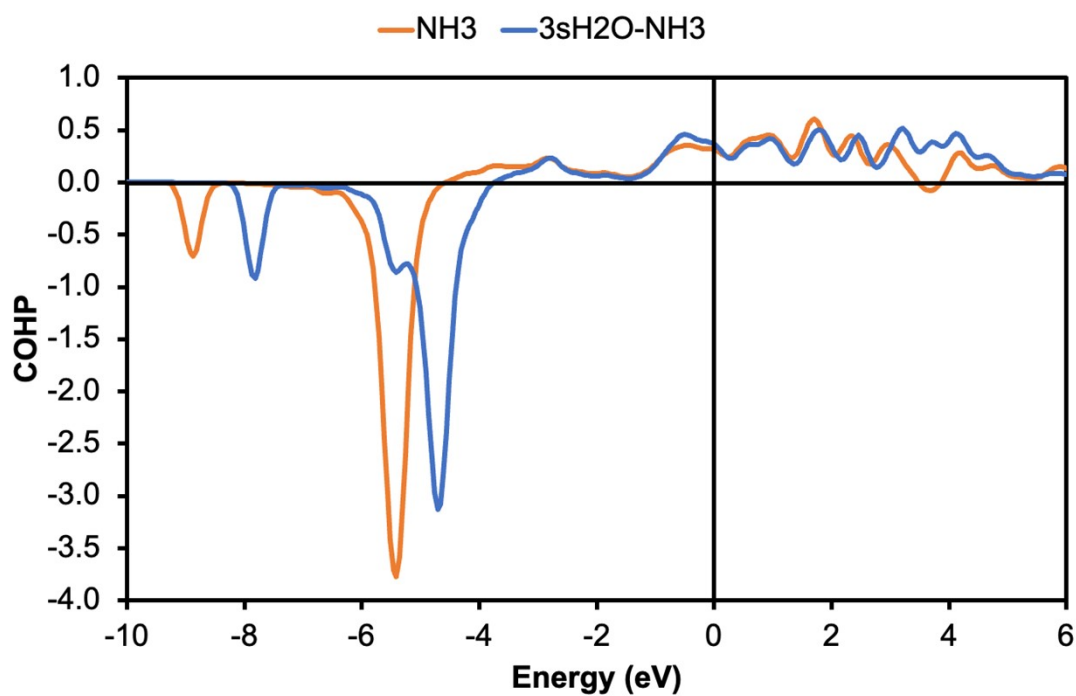

Figure S4: The COHP of Ru-N bond of  $\text{NH}_3$  (orange), and  $\text{NH}_3$  surrounded by 3  $\text{H}_2\text{O}$  molecules (blue).

Table S1: The adsorption energy of NH<sub>3</sub> on the Ru-doped Cu surface (RuCu<sub>83</sub>) vs the Cu surface (Cu<sub>84</sub>). Unit: eV.

|                    | <b>NH<sub>3</sub></b> | <b>topH<sub>2</sub>O</b> | <b>side-H<sub>2</sub>O</b> | <b>2side-H<sub>2</sub>O</b> | <b>3side-H<sub>2</sub>O</b> |
|--------------------|-----------------------|--------------------------|----------------------------|-----------------------------|-----------------------------|
| RuCu <sub>83</sub> | -1.40                 | -1.61                    | -2.02                      | -2.59                       | -3.12                       |
| Cu <sub>84</sub>   | -0.88                 | -1.07                    | -1.51                      | -2.11                       | -2.68                       |

Table S2. The adsorption energy of individual solvent molecules on the Ru-doped Cu surface (RuCu<sub>83</sub>) as compared to NH<sub>3</sub> on the same surface. Unit: eV.

|                  | <b>NH<sub>3</sub></b> | <b>H<sub>2</sub>O</b> | <b>CH<sub>3</sub>OH</b> | <b>C<sub>6</sub>H<sub>5</sub>OH-<br/>(ring ads)</b> | <b>C<sub>6</sub>H<sub>5</sub>OH<br/>(OH ads)</b> |
|------------------|-----------------------|-----------------------|-------------------------|-----------------------------------------------------|--------------------------------------------------|
| E <sub>ads</sub> | -1.40                 | -0.71                 | -0.90                   | -1.47                                               | -1.19                                            |

Table S3: The excitation energy of an electron from the Fermi level to the LUMO of NH<sub>3</sub> of the Cu surface (Cu<sub>84</sub>). Unit: eV.

| <b>Cu<sub>84</sub></b> | <b>NH<sub>3</sub></b> | <b>topH<sub>2</sub>O</b> | <b>side-H<sub>2</sub>O</b> | <b>2side-H<sub>2</sub>O</b> | <b>3side-H<sub>2</sub>O</b> |
|------------------------|-----------------------|--------------------------|----------------------------|-----------------------------|-----------------------------|
| Fermi level to LUMO    | 3.21                  | 3.29                     | 3.57                       | 3.93                        | 4.33                        |

Table S4: The Kamlet-Taft solvent parameters (<http://www.stenutz.eu/chem/solv26.php>)

| <b>Solvent</b> | <b><math>\alpha</math> (hydrogen bond donor)</b> | <b><math>\beta</math> (hydrogen bond acceptor)</b> |
|----------------|--------------------------------------------------|----------------------------------------------------|
| Phenol         | 1.65                                             | 0.30                                               |
| Water          | 1.17                                             | 0.47                                               |
| Methanol       | 0.98                                             | 0.66                                               |
